# Supplementary material
Source: PubMed Central journal article supplement (PMC6542470)
Supplement: NIHMS1031055-supplement-SI.pdf [file NIHMS1031055-supplement-SI.pdf]

## Supporting Information

### Implications of Pyran Cyclization and Pterin Conformation on Oxidized forms of the Molybdenum Cofactor

*Douglas R. Gisewhite<sup>a</sup>, Jing Yang<sup>b</sup>, Benjamin R. Williams<sup>a</sup>, Alisha Esmail<sup>a</sup>, Benjamin Stein<sup>b</sup>, Martin L. Kirk<sup>\*b</sup>, Sharon J. N. Burgmayer<sup>\*a</sup>*

<sup>a</sup>Department of Chemistry, Bryn Mawr College, Bryn Mawr, Pennsylvania 19010, USA;

<sup>b</sup>Department of Chemistry and Chemical Biology, The University of New Mexico, MSC03 2060, 1 University of New Mexico, Albuquerque, New Mexico 87131-0001, United States

#### Contents:

|             |                                                                                                              |          |
|-------------|--------------------------------------------------------------------------------------------------------------|----------|
| Figure S1.  | <sup>1</sup> H NMR spectrum of BDMPP in Chloroform-d.                                                        | Page S3  |
| Figure S2.  | <sup>1</sup> H NMR spectrum of <b>2</b> in Acetonitrile-d <sup>3</sup> .                                     | Page S4  |
| Figure S3.  | HSQC spectrum of <b>2</b> in Chloroform-d.                                                                   | Page S5  |
| Figure S4.  | UV-vis overlay of <b>1</b> and <b>2</b> in Acetonitrile.                                                     | Page S6  |
| Figure S5.  | UV-vis overlay of <b>1</b> and <b>2</b> in CHCl <sub>3</sub> .                                               | Page S7  |
| Figure S6.  | Computed transitions and EDDMs for <b>2</b> .                                                                | Page S8  |
| Figure S7.  | Mo K-edge XANES spectra                                                                                      | Page S9  |
| Figure S8.  | Cyclic voltammogram overlay of <b>1</b> and <b>2</b> in Chloroform.                                          | Page S10 |
| Table S1.   | Cyclic voltammetric data for <b>1</b> and <b>2</b> in acetonitrile (ACN) and chloroform (CHCl <sub>3</sub> ) | Page S10 |
| Figure S9   | Cyclic voltammograms under variable scan rate for <b>1</b> and <b>2</b> in acetonitrile                      | Page S11 |
| Figure S10. | Illustration of pterin-dithiolene dihedral angle rotation of <b>2</b> .                                      | Page S12 |
| Figure S11. | Calculated total energy as a function of rotation about the pterin-dithiolene bond in <b>2</b> .             | Page S12 |
| Table S2.   | Electronic absorption spectroscopy band assignments for <b>1</b>                                             | Page S13 |
| Figure S12. | EDDMs absorption bands A, C and D for <b>1</b>                                                               | Page S14 |
| Figure S13. | Resonance Raman profiles for <b>2</b>                                                                        | Page S15 |

|                                         |                                                                           |              |
|-----------------------------------------|---------------------------------------------------------------------------|--------------|
| Figure S14.                             | Experimental and computed resonance Raman spectra for <b>1</b>            | Page S15     |
| Figure S15.                             | Experimental and computed HRESI (-) spectra for <b>2</b> .                | Page S16     |
| Figure S16.                             | Mo K-edge FT of EXAFS for <b>1</b> and <b>2</b> .                         | Page S17     |
| Table S3.                               | Comparison of Mo K-edge EXAFS best-fit parameters for <b>1</b> & <b>2</b> | Page S17-S18 |
| Analysis of S K-edge XAS Data.          |                                                                           | Page S18     |
| Resonance Raman frequency assignments . |                                                                           | Page S19     |

Figure S1.  $^1\text{H}$  NMR spectrum of BDMPP in chloroform-d.

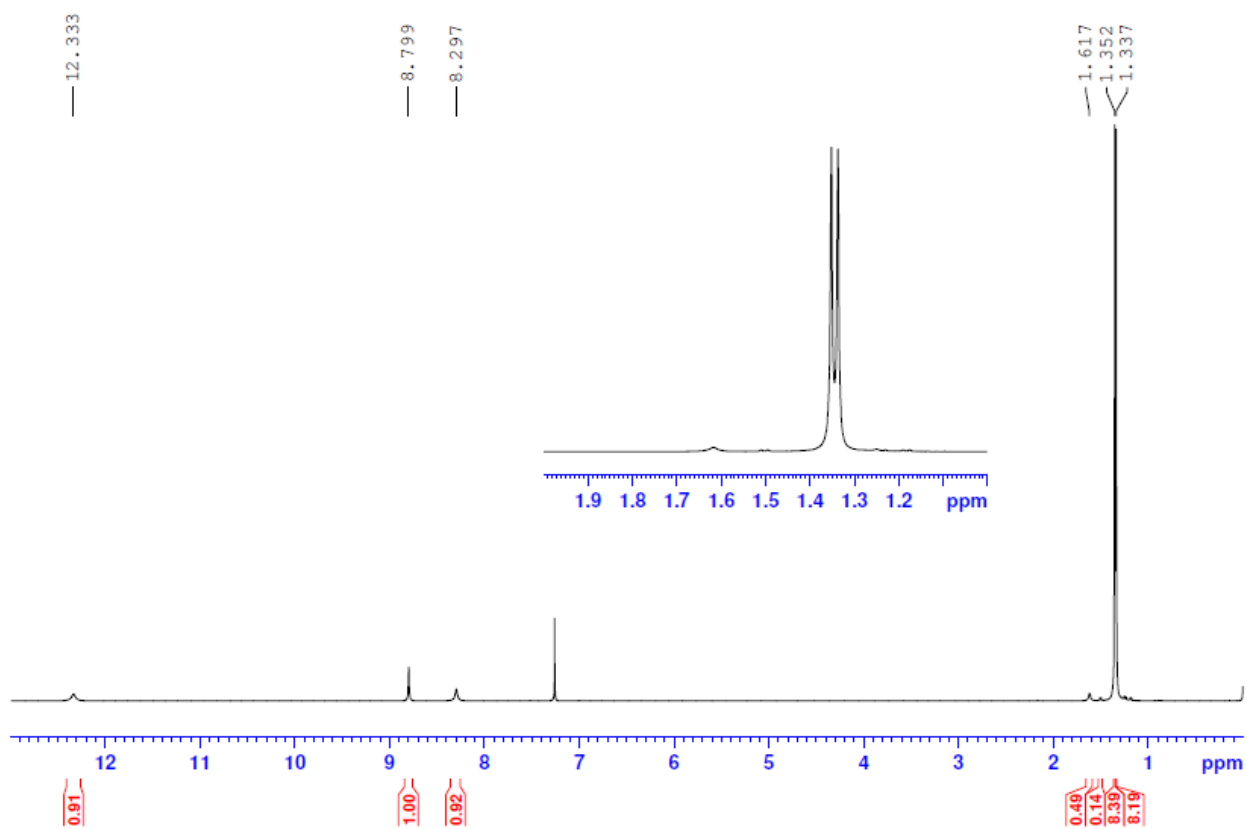

Figure S2.  $^1\text{H}$  NMR spectrum of **2** in acetonitrile- $d_3$ .

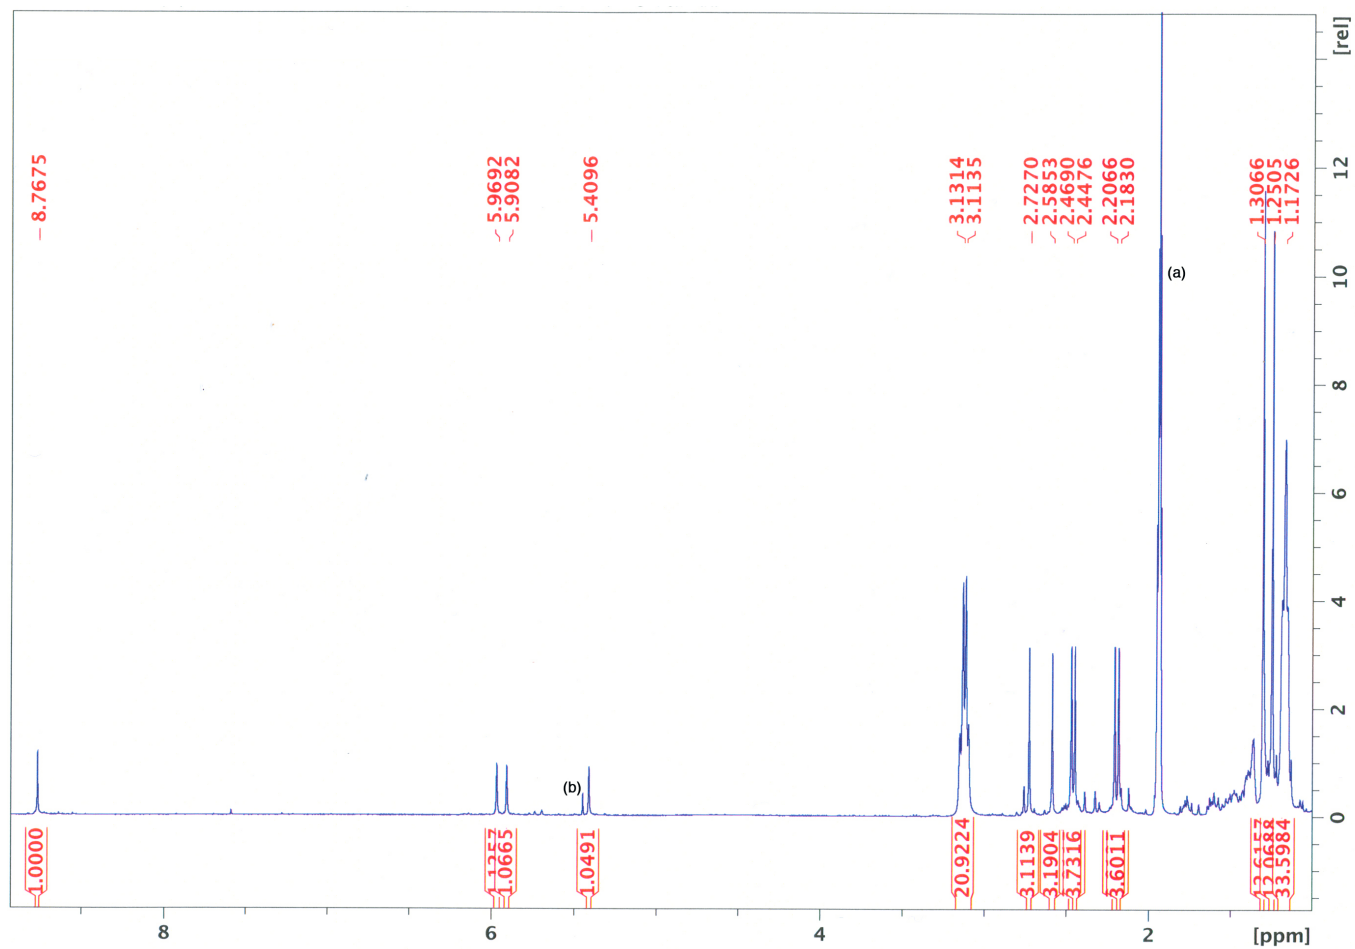

- (a) Residual acetonitrile resonance
- (b) Contaminant  $\text{CH}_2\text{Cl}_2$

Figure S3. HSQC spectrum of **2** in chloroform-d.

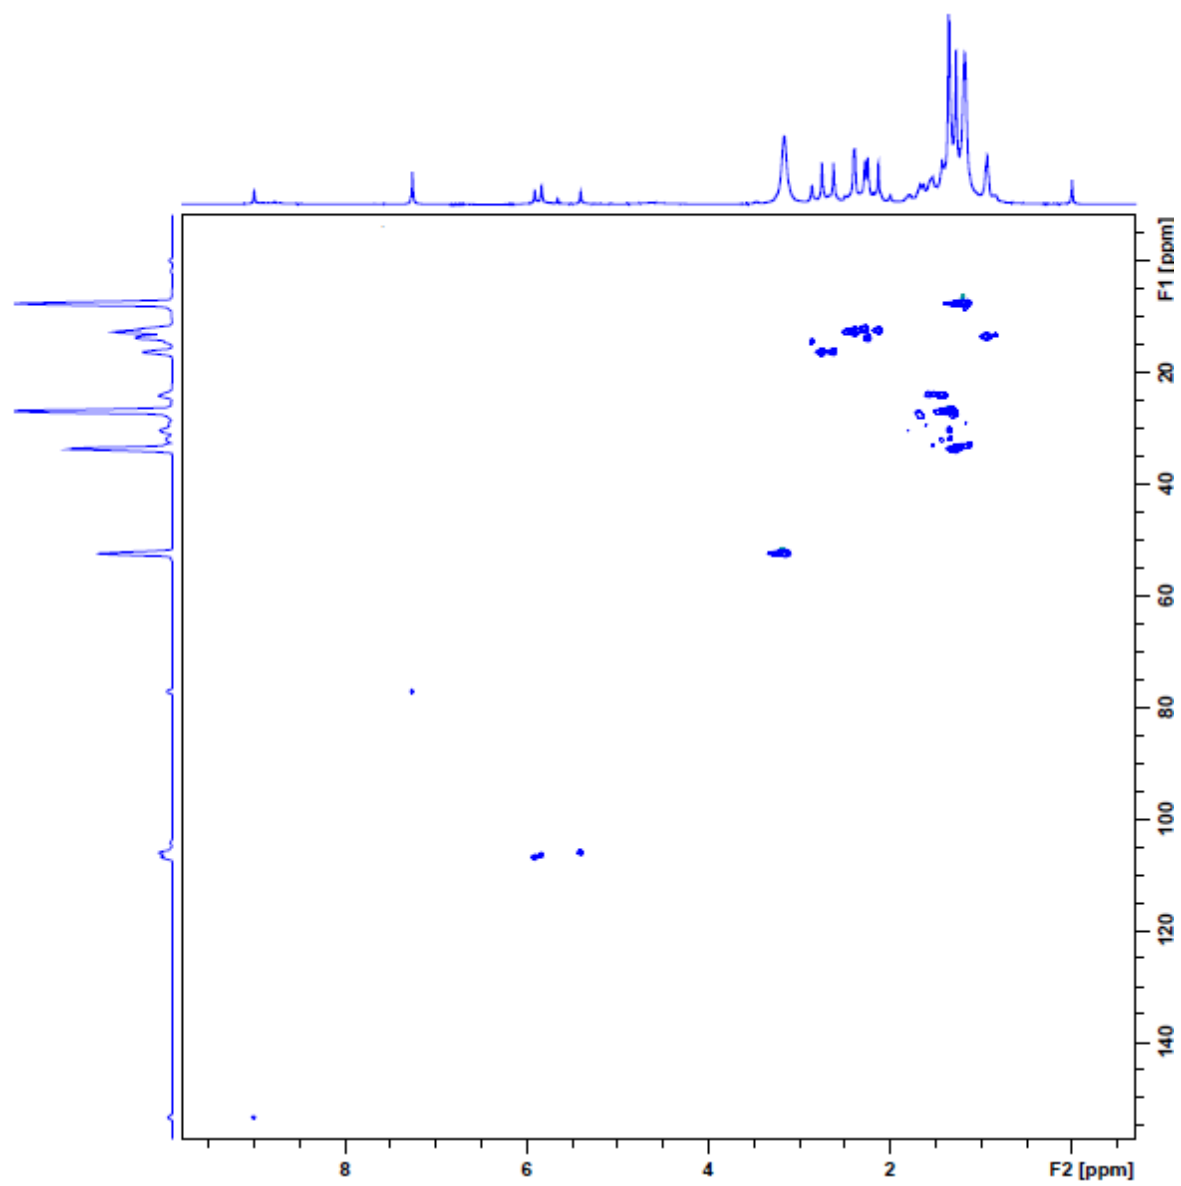

**Figure S4.** UV-vis overlay of **1** (blue) and **2** (red) in acetonitrile at  $3.00 \times 10^{-5}$  M.

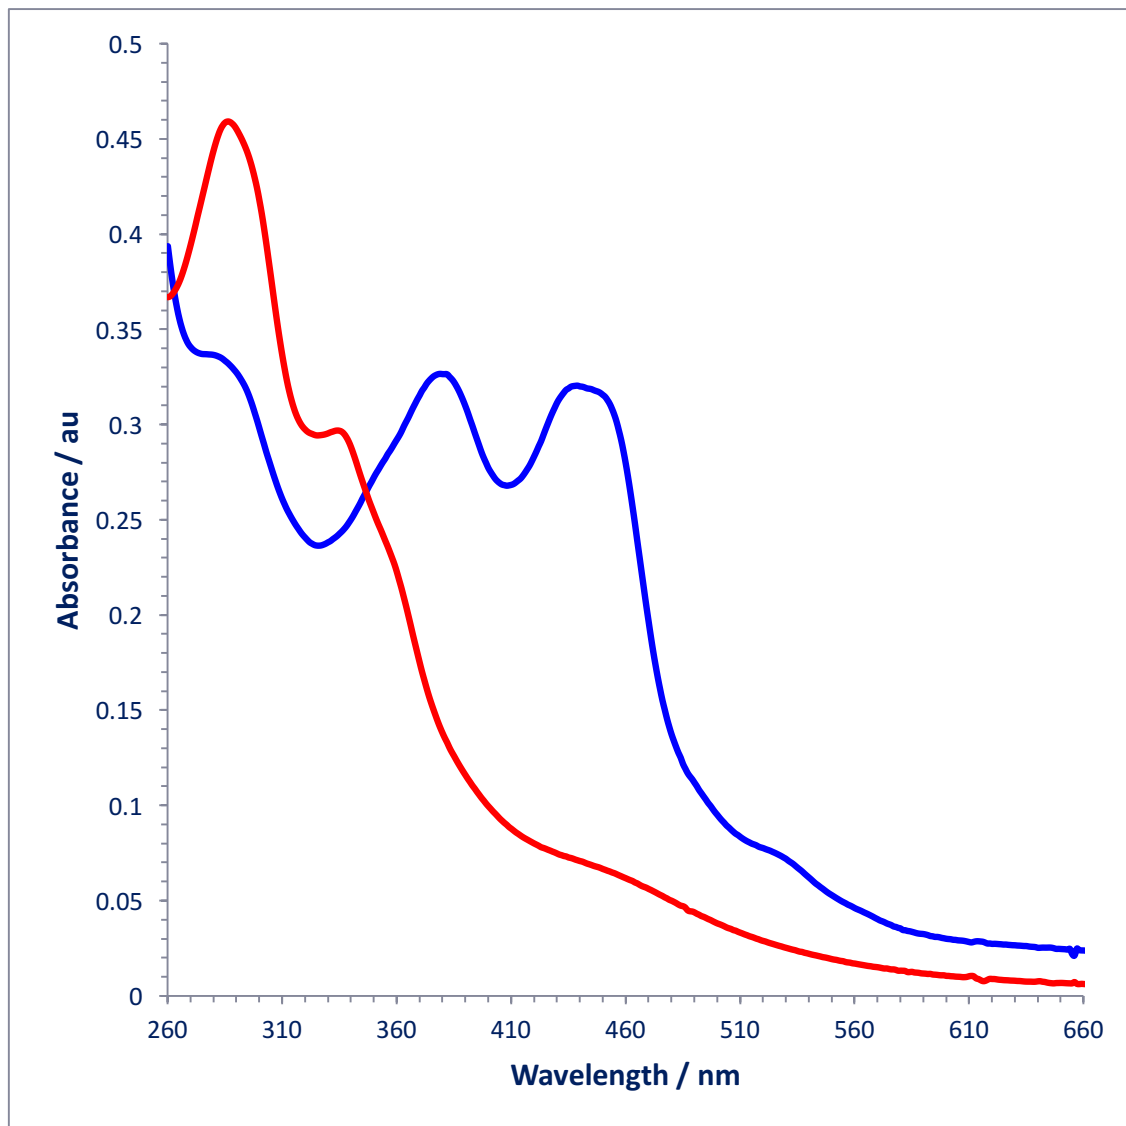

Figure S5. UV-vis overlay of **1** (blue) and **2** (red) in CHCl<sub>3</sub> at 3.00 x 10<sup>-5</sup> M.

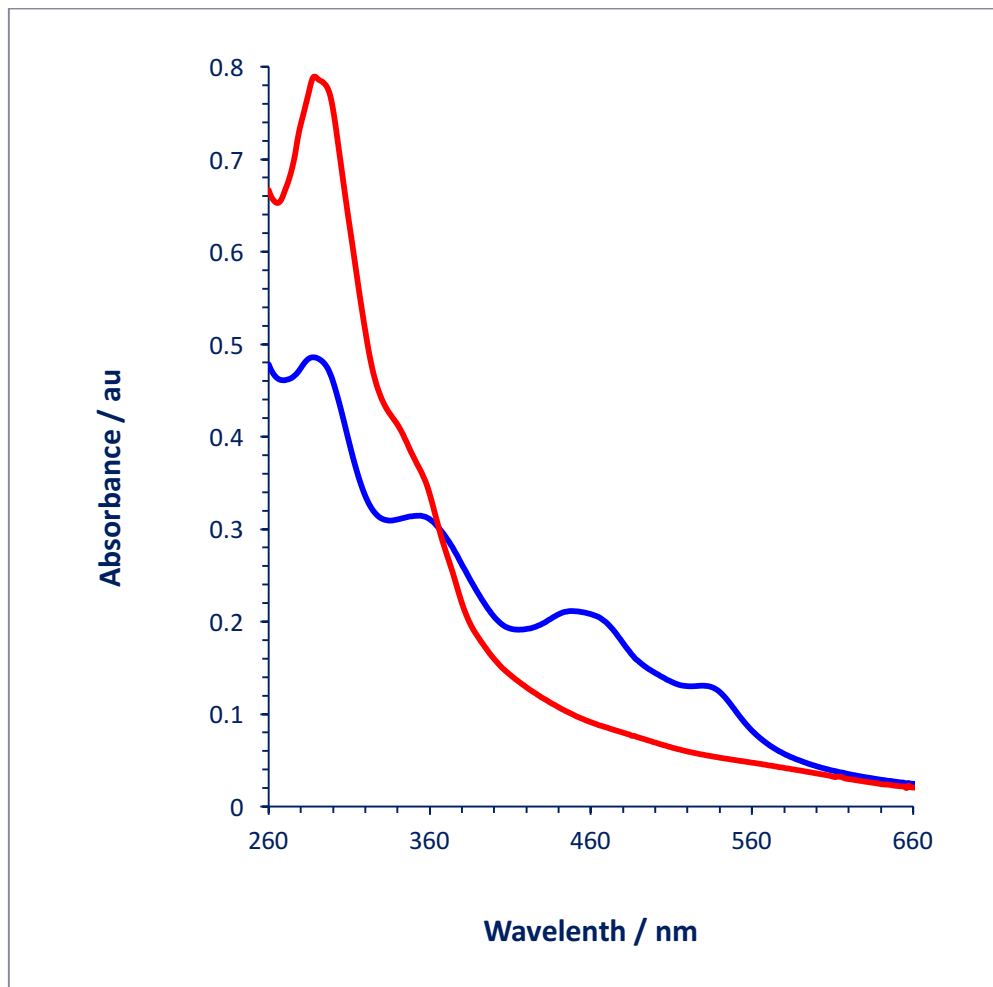

Figure S6. Computed charge transfer transitions for 2, including EDDMs that depict their dominant dithiolene  $\rightarrow$  pterin ILCT character.

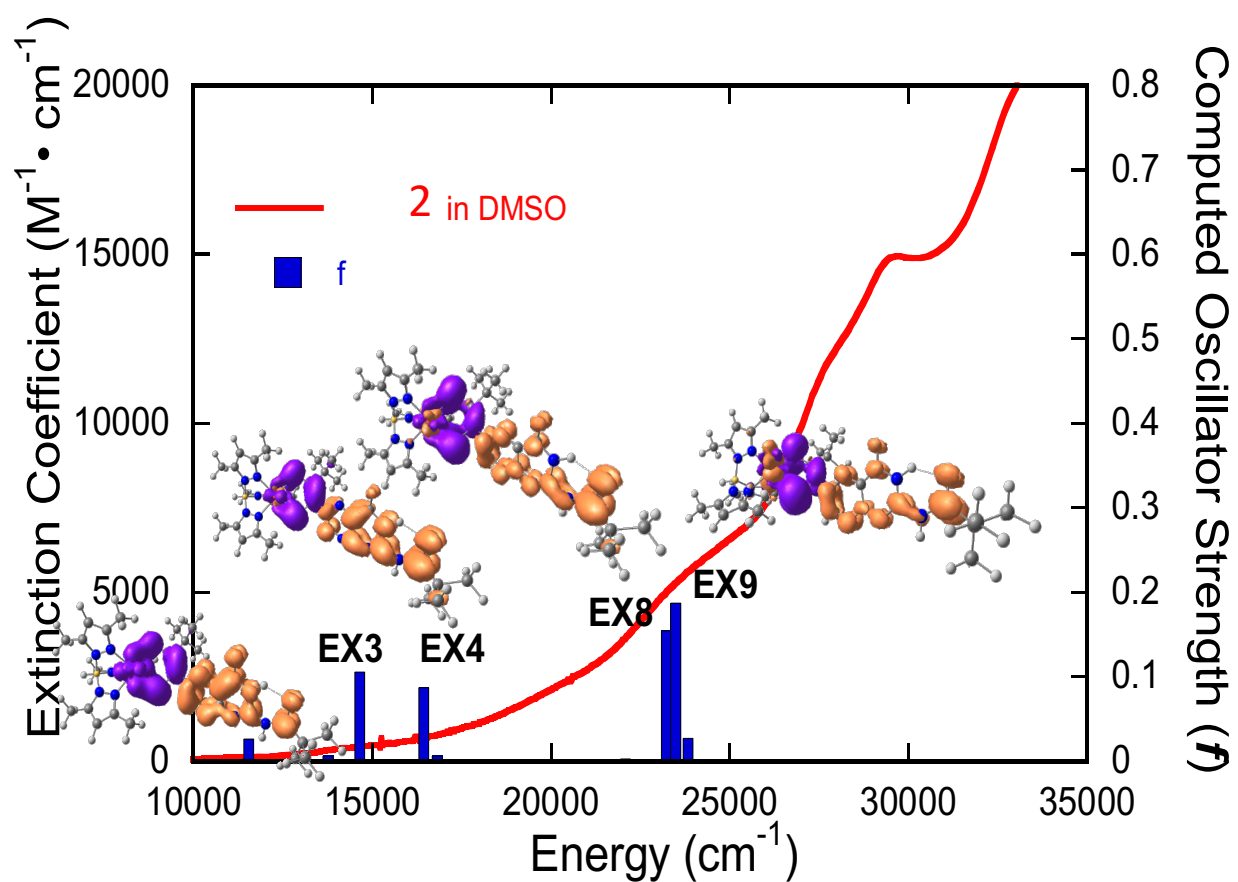



Figure S7. Mo K-edge XANES spectra for 1 and 2.

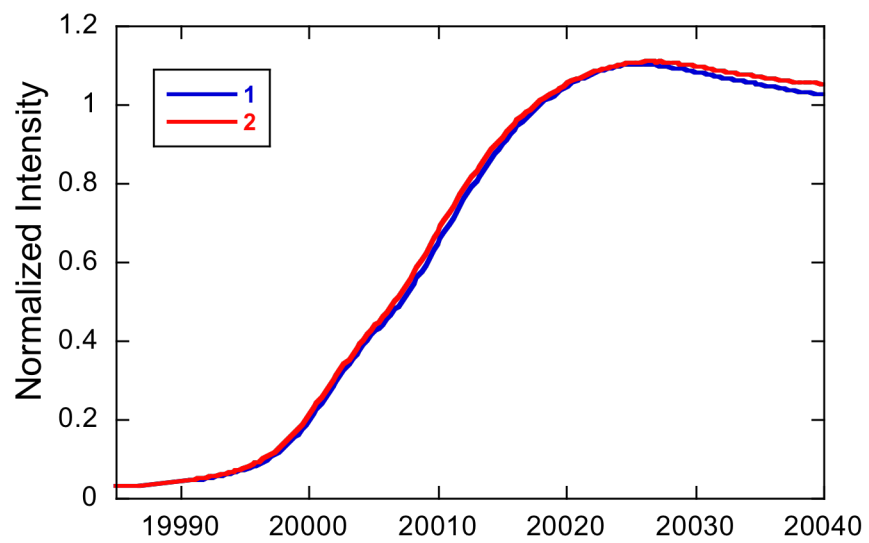

Figure S8. Cyclic voltammogram overlay of **1** (blue) and **2** (red) in Chloroform.

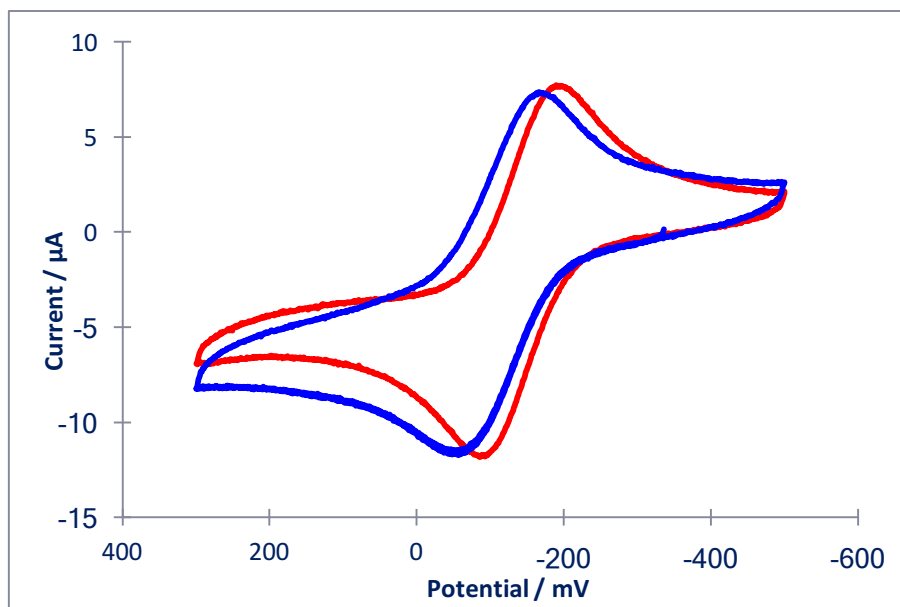

Cyclic voltammograms of **1** (blue) and **2** (red), in 0.10 M TBAP/CHCl<sub>3</sub> vs Ag/AgCl at a Pt working electrode, scan rate 100 mV/sec.

Table S1. Cyclic voltammetric data for **1** and **2** in acetonitrile (ACN) and dichloroform (CHCl<sub>3</sub>)

| Complex (solvent)             | Scan rate, mV/s | E(1/2), mV <sup>a</sup> | p <sub>c</sub> - p <sub>a</sub> , mV <sup>b</sup> | i <sub>c</sub> / i <sub>a</sub> <sup>c</sup> |
|-------------------------------|-----------------|-------------------------|---------------------------------------------------|----------------------------------------------|
| <b>1</b> (ACN)                | 25              | -519                    | 74                                                | 0.99                                         |
| <b>1</b> (ACN)                | 100             | -520                    | 74                                                | 0.99                                         |
| <b>1</b> (ACN)                | 400             | -521                    | 81                                                | 1.03                                         |
| <b>1</b> (ACN)                | 800             | -520                    | 89                                                | 0.96                                         |
| <b>2</b> (ACN)                | 25              | -572                    | 80                                                | 0.98                                         |
| <b>2</b> (ACN)                | 100             | -574                    | 83                                                | 0.96                                         |
| <b>2</b> (ACN)                | 400             | -575                    | 99                                                | 1.00                                         |
| <b>2</b> (ACN)                | 800             | -573                    | 100                                               | 1.05                                         |
| <b>1</b> (CHCl <sub>3</sub> ) | 100             | -621                    | 115                                               | 0.98                                         |
| <b>2</b> (CHCl <sub>3</sub> ) | 100             | -650                    | 108                                               | 0.97                                         |

<sup>a</sup> vs Fc<sup>+</sup>/Fc, +440 mV vs Ag/AgCl, (p<sub>c</sub> - p<sub>a</sub>) = 73 mV in ACN; or +510 mV vs Ag/AgCl, (p<sub>c</sub> - p<sub>a</sub>) = 100 mV in CHCl<sub>3</sub>, 100 mV/sec

<sup>b</sup> difference between cathodic and anodic potentials

<sup>c</sup> ratio of cathodic to anodic currents

Figure S9. Cyclic voltammograms under variable scan rate for 1 (top) and 2 (bottom) in acetonitrile, 0.1M TBAP, vs AgCl/Ag.

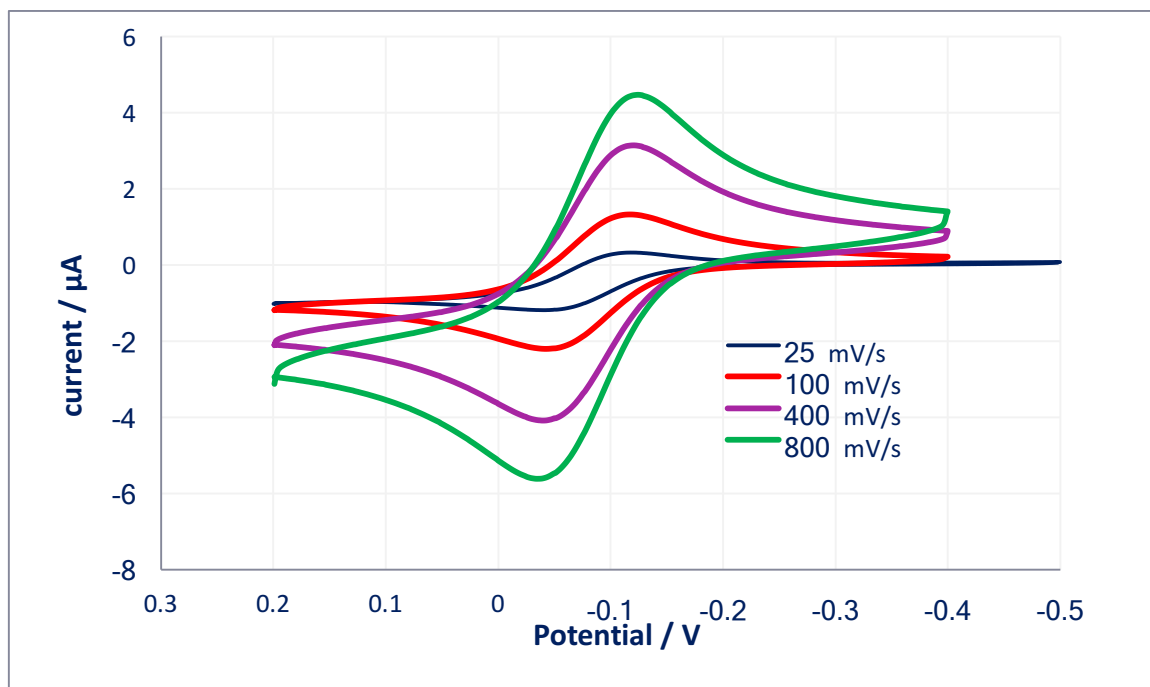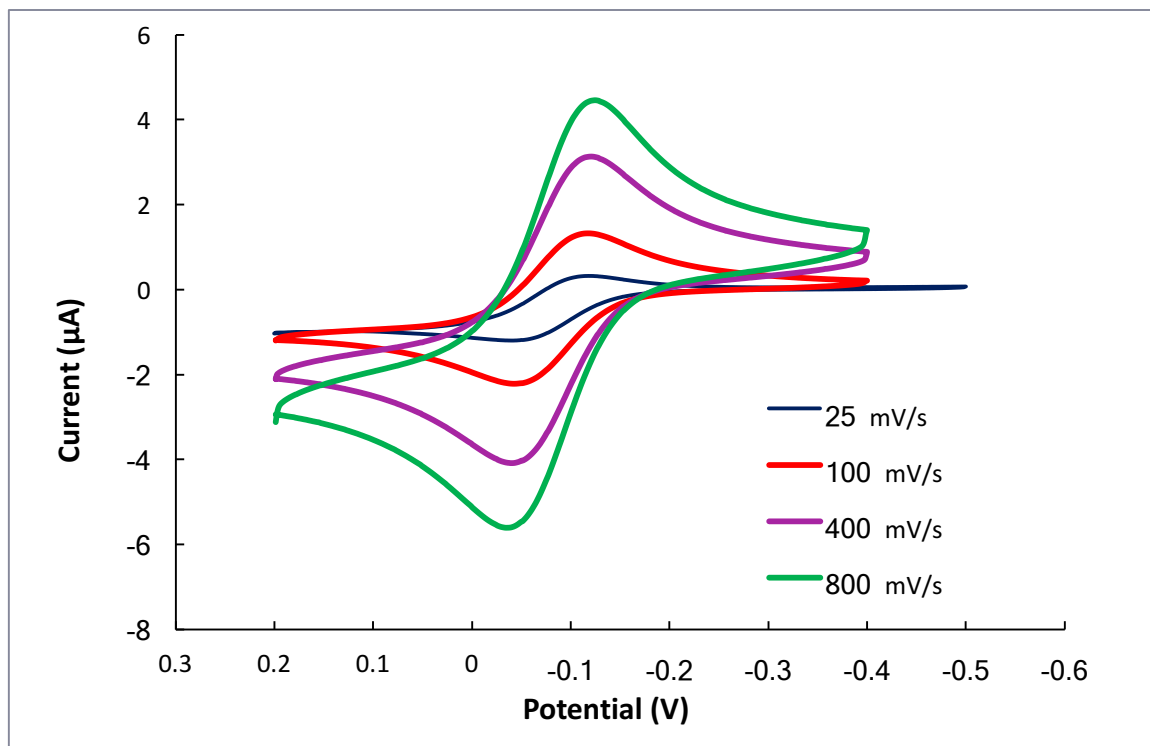

**Figure S10.** Illustration of pterin-dithiolene dihedral angle rotation of **2**.

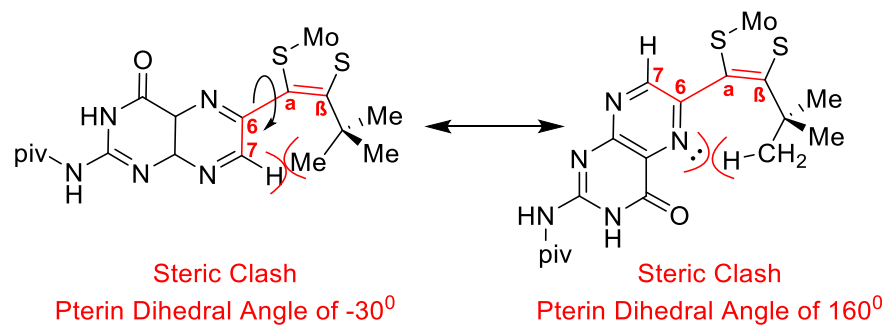

Calculated total energy as a function of rotation about the pterin-dithiolene bond in **2** (all other atoms remain frozen).

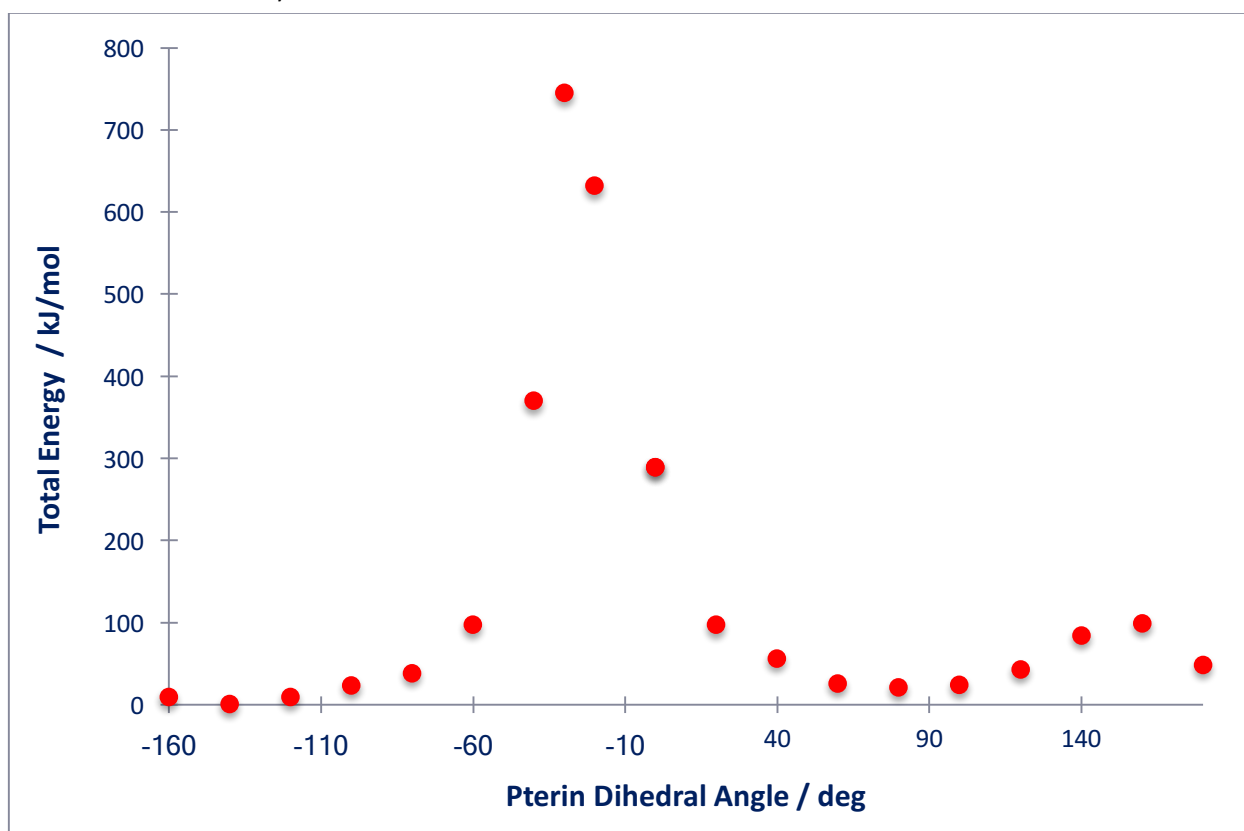

**Table S2.** Electronic absorption spectroscopy band assignments for **1**

| Band | Energy (cm <sup>-1</sup> ) | Oscillator Strength (Exp) | Oscillator Strength (Calc) | Band Assignment (one-electron promotions that contribute to individual transitions are grouped by number)                                                                                                                              |
|------|----------------------------|---------------------------|----------------------------|----------------------------------------------------------------------------------------------------------------------------------------------------------------------------------------------------------------------------------------|
| A    | 20,000                     | 0.028                     | 0.0052                     | 1. H0(xy)→L0(pterin) (44%)<br>1. H0(xy)→L+2(xz) (34%)                                                                                                                                                                                  |
| B    | 22,500                     | 0.115                     | 0.2676                     | 1. H-1(dithiolene)→L0(pterin) (86%)                                                                                                                                                                                                    |
| C    | 24,000                     | 0.040                     | 0.1429                     | 1. H-1(dithiolene)→L+1(xz+pterin) (51%)<br>1. H-1(dithiolene)→L+2(xz) (17%)<br>2. H0(xy)→L+3(yz+Tp) (28%)<br>2. H0(xy)→L+5(yz+Tp) (19%)<br>2. H0(xy)→L+6(yz+Tp) (18%)<br>3. H0(xy)→L+7(xz+pterin) (22%)<br>3. H0(xy)→L+4(pterin) (22%) |
| D    | 26,000                     | 0.196                     | 0.4543                     | 1. H-2(dithiolene)→L0(pterin) (80%)                                                                                                                                                                                                    |

**Figure S11.** EDDMs for bands A, C, and D in **1**. The purple regions represent an electron density loss in the transition and the orange regions represent an electron density gain in the transition. The LUMO, HOMO, HOMO-1, and HOMO-2 are given below.

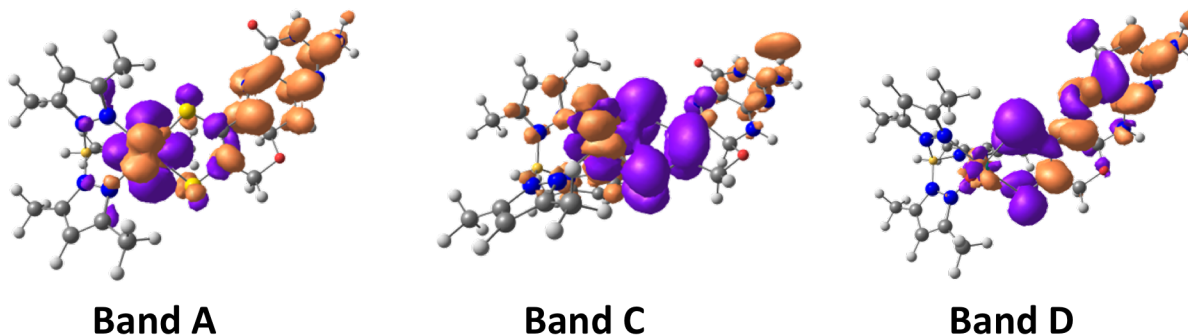

HOMO

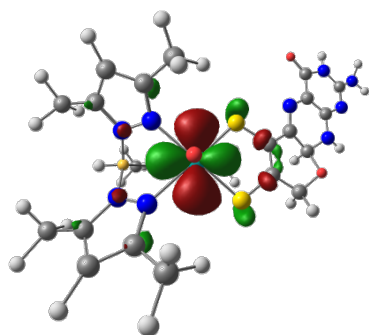

LUMO

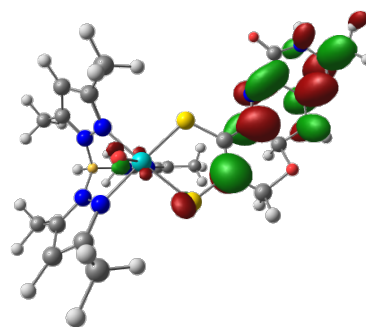

HOMO-1

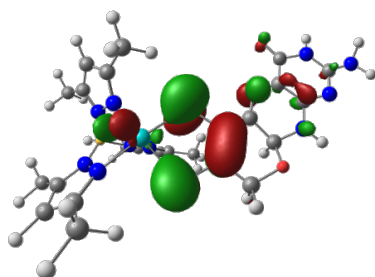

HOMO-2

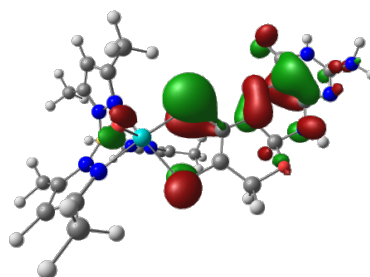

**Figure S12.** Resonance Raman profiles for **2**.

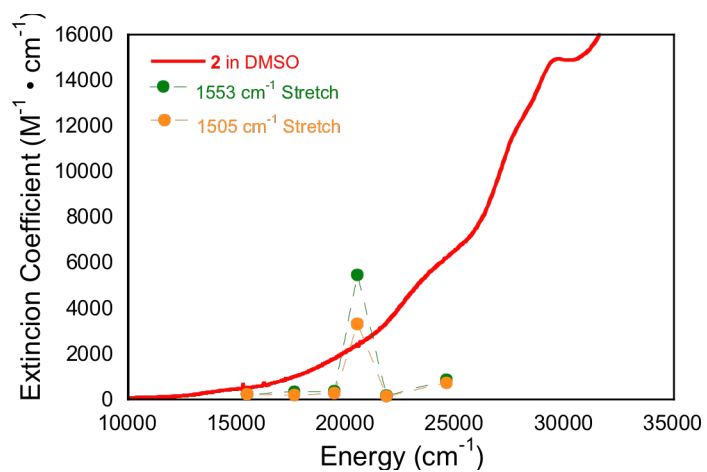

**Figure S13.** Experimental and computed resonance Raman spectra for **1**. A 0.975 scaling factor has been applied to the computed vibrational frequencies.

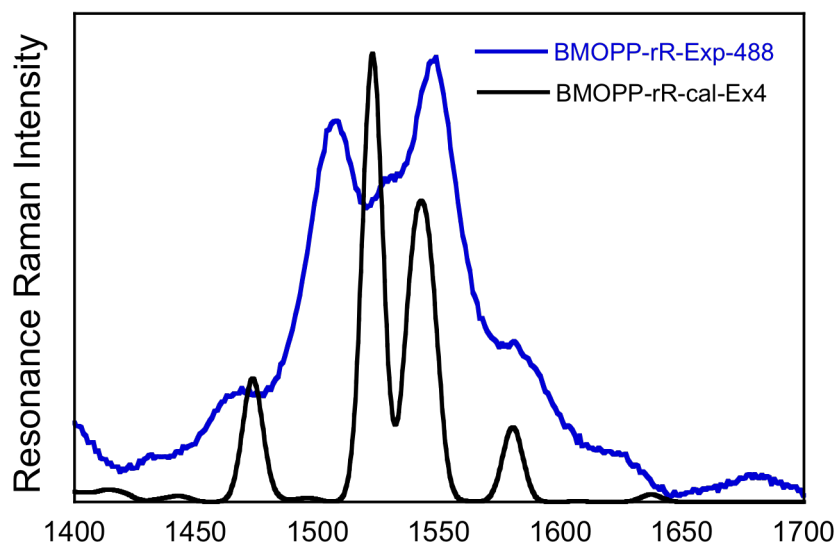

**Figure S14.** Experimental and computed HRESI (-) spectra for **2**. (Top) Experimental HRESI (-) of compound **2**. (Bottom) Calculated HRESI spectrum for [M-] as C<sub>32</sub>H<sub>42</sub>O<sub>3</sub>N<sub>11</sub>BMoS<sub>2</sub>.

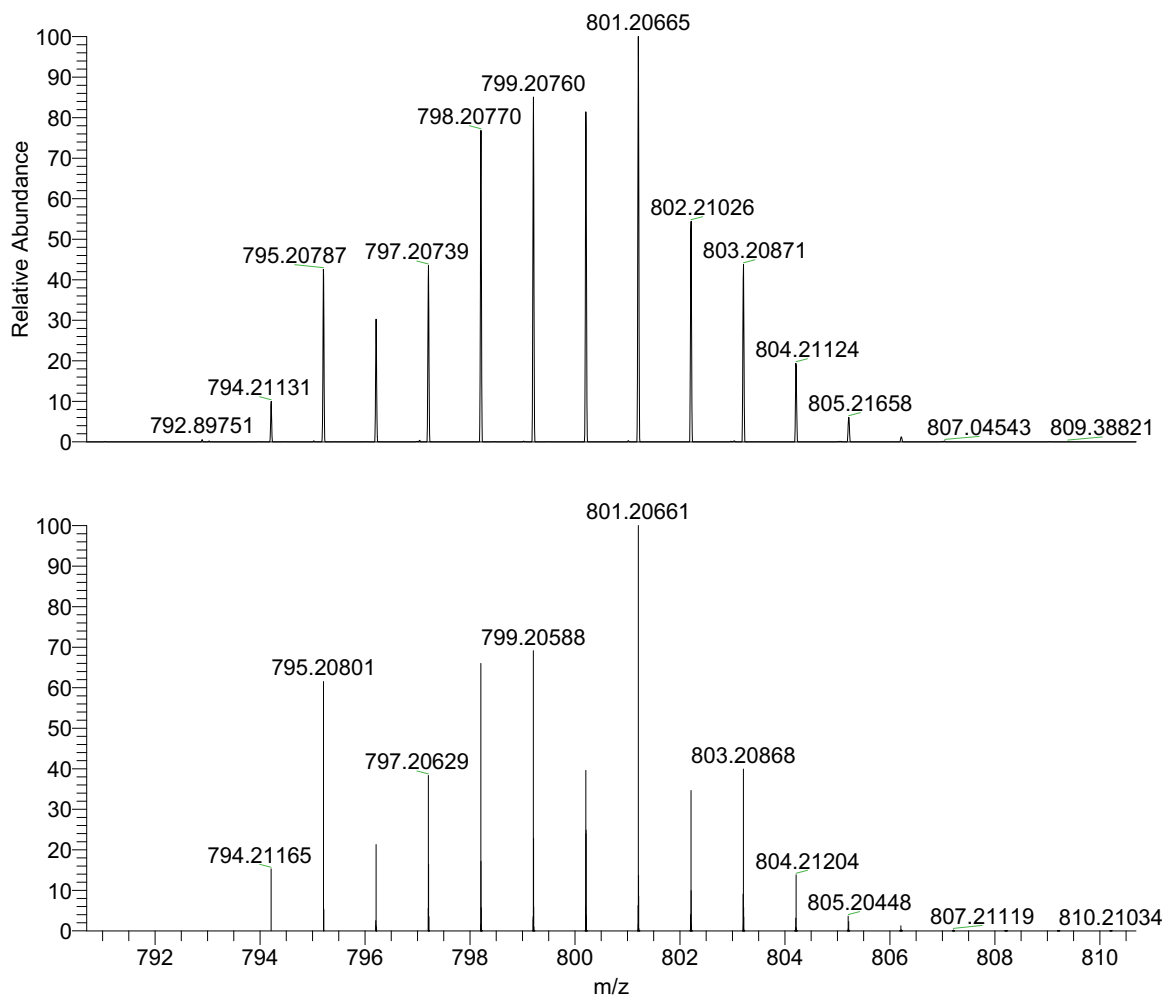



**Figure S15.** (Top) Mo K-edge Fourier transform of the EXAFS data for **1** and best fit to the data. (Bottom) Mo K-edge Fourier transform of the EXAFS data for **2** and best fit to the data. Data have been phase corrected using Mo-oxo backscattering.

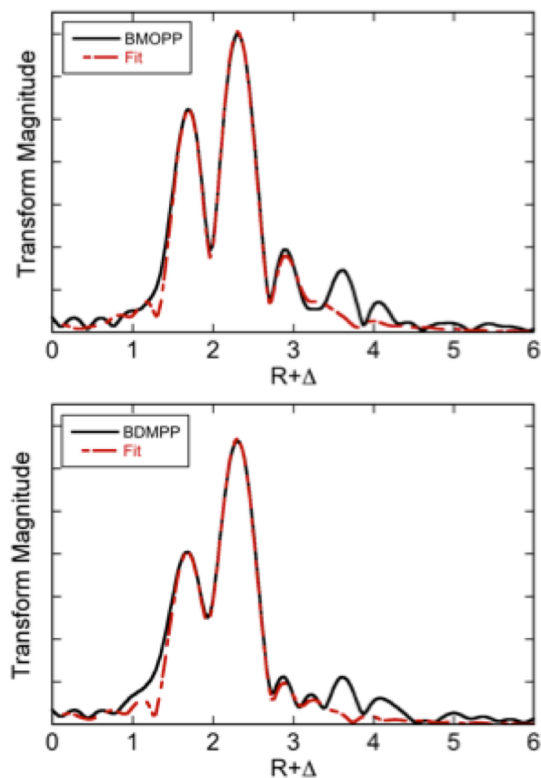

**Table S3.** Mo K-edge EXAFS best-fit parameters comparing **1** and **2**

|                | <b>[TEA][Tp*Mo(O)(S<sub>2</sub>BMOPP)] 1</b> |                     |                              | <b>[TEA][Tp*Mo(O)(S<sub>2</sub>BDMPP)] 2</b> |       |                              |       |
|----------------|----------------------------------------------|---------------------|------------------------------|----------------------------------------------|-------|------------------------------|-------|
|                | N                                            | R (Å)               | $\sigma^2$ (Å <sup>2</sup> ) | N                                            | R (Å) | $\sigma^2$ (Å <sup>2</sup> ) |       |
| Mo-O           | 1                                            | 1.677               | 0.001                        | Mo-O                                         | 1     | 1.677                        | 0.002 |
| Mo-S           | 2                                            | [1.645(7)]          | 0.003                        | Mo-S                                         | 2     | 2.339                        | 0.003 |
|                |                                              | [2.370(3)]          |                              |                                              |       |                              |       |
| Mo-N(eq)       | 2                                            | 2.268               | 0.017                        | Mo-N(eq)                                     | 2     | 2.254                        | 0.016 |
| Mo-N (bottom)  | 1                                            | [2.184(9)]          | 0.002                        | Mo-N (bottom)                                | 1     | 2.620                        | 0.001 |
|                |                                              | 2.696               |                              |                                              |       |                              |       |
| Mo-C/N         | 6                                            | [2.399(9)]<br>3.292 | 0.008                        | Mo-C/N                                       | 6     | 3.233                        | 0.012 |
| <b>ΔE (eV)</b> |                                              | -4.292              |                              |                                              |       | -6.594                       |       |
| <b>R%</b>      |                                              | 5.92                |                              |                                              |       | 6.53                         |       |

The bond distances for the x-ray structure of **1** are given in brackets. Fourier transformed EXAFS modulations for these compounds are presented in Fig. S14. The EXAFS for both **1** and **2** are dominated by two main backscattering interactions with transform peaks at  $R+\Delta \sim 1.68 \text{ \AA}$  and  $\sim 2.35 \text{ \AA}$ . These are assignable as arising from Mo-oxo and Mo-S scatters, respectively. The analysis of the data reveals that **1** and **2** have nearly identical 6-coordinate  $\text{MoOS}_2\text{N}_3$  first coordination spheres with compound **2** possessing slightly shorter Mo-S bond lengths ( $\sim 0.03 \text{ \AA}$ ). The EXAFS results are summarized in Table 1, and show excellent agreement with DFT computed bond lengths for geometrically optimized structures.

**Analysis of S K-edge XAS Data.** To quantitate the amount of S p orbital character in the low-energy  $1s \rightarrow \psi^*$  type transitions that comprise pre-edge Bands A and B, we define the total S 3p orbital character per hole ( $\alpha^2$ ) that contribute to the intensity of these pre-edge peaks using the equation,

$$D_0 = \frac{h}{3N} \alpha^2 I_{s(1s \rightarrow 3p)} \quad (1)$$

Here,  $D_0$  is the integrated area under a given pre-edge peak,  $h$  is the number of holes,  $N$  is the number of absorbers ( $N = 2$  for a dithiolene ligand), and  $I_{s(1s \rightarrow 3p)}$  is the dipole integral for a  $1s \rightarrow 3p$  transition. We adopt a value of  $I_s = 11$  for both the dithiolene ligands in **1** and **2** using previous published XAS data that relates the magnitude of the dipole integral with the S  $1s \rightarrow 4p$  transition energy position.<sup>1</sup> To determine the integrated areas of the pre-edge peaks for **1** and **2**, an arctangent function was fit to the step edge peaks and pseudo-Voigt functions were fit to the pre-edge region (Fig. 13). The integrated areas for pre-edge Bands A, B, and C are thus determined to be 0.08, 0.14, and 0.81 for **1**, and 0.06, 0.38, and 1.32 for **2**, respectively.

The LUMO of compound **1** possesses two holes ( $h = 2$ ). Using Eqn. 1 with  $h = 2$  we obtain  $\alpha^2 = 0.022$ , or 2.2% S character per hole for this pterin-dithiolene based LUMO. Similarly, for **2** we use  $h = 4$ , since there are two pterin based LUMO orbitals, and obtain  $\alpha^2 = 0.008$ , or 0.8% S character per hole. Thus, the total S character present in the pterin LUMO of **1** (2.2% total S) compared with the two pterin LUMOs of **2** (1.6% total S) shows that the S character in these pterin-based ILCT acceptor orbitals is small. In our analysis of Band B, we use  $h = 4$  to obtain  $\alpha^2 = 0.019$ , or 1.9% S character per hole (3.8% total for the (xz,yz) pair) for the Mo(xz,yz) orbitals of **1**. This compares with 5.2% S character per hole (10.4% for the (xz,yz) pair) for the Mo(xz,yz) orbitals of **2**.

**Resonance Raman Frequency Assignments.** In order to assign the most intense high frequency Raman vibrations ( $\sim 1,450 - 1,600 \text{ cm}^{-1}$ ) and confirm the ILCT assignment for absorption band B in **1**, we have collected resonance Raman excitation profiles for the  $1508 \text{ cm}^{-1}$  and  $1549 \text{ cm}^{-1}$  Raman bands in **1** (Fig. 6) and the related  $1505 \text{ cm}^{-1}$  and  $1553 \text{ cm}^{-1}$  Raman bands in **2** (Fig. S13). Excitation at 488 nm pumps the low energy envelope of the dithiolene  $\rightarrow$  pterin ILCT transition in **1**, resulting in resonance enhancement of normal modes that characterize the nature of the ILCT excited state distortion relative to the ground state geometry. We have computed the resonance Raman spectra for **1** (Figure S14) by setting the theoretical excitation energy to be equal to the TDDFT calculated transition energy for absorption band B. Large resonance enhancements were computed for computed vibrations at  $1520 \text{ cm}^{-1}$  and  $1544 \text{ cm}^{-1}$  in **1**, which correspond to resonantly enhanced experimental vibrational modes observed at  $1508 \text{ cm}^{-1}$  and  $1549 \text{ cm}^{-1}$ , respectively (Figure 10). The strong correlation between computed and experimental resonantly enhanced vibrations yields  $\lambda = 0.975$  as the effective scaling factor for all the high frequency modes in the  $\sim 1,450 - 1,600 \text{ cm}^{-1}$  region.

Using the  $\lambda = 0.975$  frequency scaling factor and making use of the computed resonance Raman intensities and frequencies for **1**, the two most enhanced vibrations observed on resonance with absorption band B are assigned as (1) a pterin-dithiolene stretching modes that possess dominant dithiolene C=C stretch and pterin (pyrazine) C=N stretch character ( $1508 \text{ cm}^{-1}$ ), and (2) a pterin-dithiolene mode with dominant dithiolene C=C stretch and pterin (pyrimidine) C=N stretch character ( $1549 \text{ cm}^{-1}$ ) (Fig. 10). We are also able to confidently assign the  $1467 \text{ cm}^{-1}$  vibration as a pterin ring mode with both C=N and C=C motions and the  $1580 \text{ cm}^{-1}$  vibration as a pterin mode with C=C stretching character.

The strong resonance Raman enhancement of vibrational modes with pterin-dithiolene C=C and C=N character that are observed with excitation into absorption band B is fully consistent with the assignment of this band as a (HOMO-1) dithiolene  $\rightarrow$  LUMO (pterin) ILCT transition. This one-electron promotion results in electron density being removed from the dithiolene HOMO-1, which possesses C=C  $\pi$  bonding character, and placed in a pterin LUMO with dominant C=C and C=N  $\pi^*$  antibonding character. The resonance enhancement pattern also supports our assignment of absorption band A (Figure 6) as possessing (HOMO)  $\text{Mo}(x^2-y^2) \rightarrow$  LUMO (pterin) MLCT character. The HOMO orbital of **1** is the doubly occupied  $\text{Mo}(x^2-y^2)$  orbital, which possesses small degree of C=C pseudo- $\sigma$  bonding character, and as a result weaker resonance enhancement of both the  $1508 \text{ cm}^{-1}$  (C=C) and  $1549 \text{ cm}^{-1}$  (C=C) modes is observed when exciting in resonance with absorption band A. The resonance Raman profile for **2** shows resonance enhancement of the  $1505 \text{ cm}^{-1}$  and  $1553 \text{ cm}^{-1}$  modes with excitation at 488nm (Fig.

S13). Our DFT frequency calculations allow the 1505 cm<sup>-1</sup> and 1553 cm<sup>-1</sup> bands to be assigned as to modes that possess dithiolene C=C and pterin C=N/C=C stretching character with mode descriptions that essentially parallel those for **1**. Resonance enhancement of the 1505 cm<sup>-1</sup> and 1553 cm<sup>-1</sup> bands, coupled with the similarity in appearance for the Raman spectra of **1** and **2**, indicates dithiolene → pterin charge transfer character is also present in the charge transfer bands of **2**.

1. Sarangi, R.; George, S. D.; Rudd, D. J.; Szilagy, R. K.; Ribas, X.; Rovira, C.; Almeida, M.; Hodgson, K. O.; Hedman, B.; Solomon, E. I., Sulfur K-edge X-ray absorption spectroscopy as a probe of ligand-metal bond covalency: Metal vs ligand oxidation in copper and nickel dithiolene complexes. *J. Am. Chem. Soc.* **2007**, *129* (8), 2316-2326.
